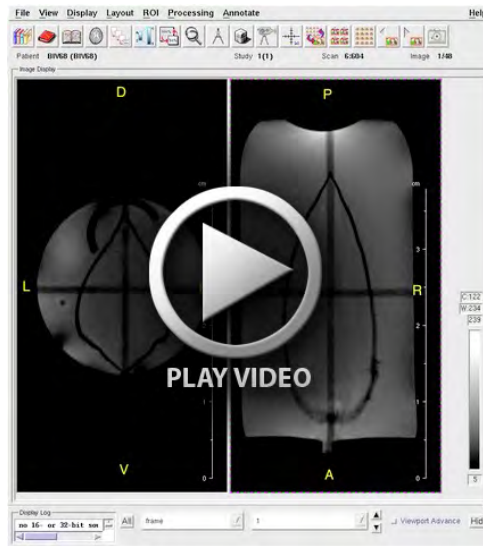

**Movie S1. Transverse and horizontal  $T_{1w}$ -MR images of *M. galloprovincialis*.** Images were measured every 2.55 min for 81.6 min (32 images).

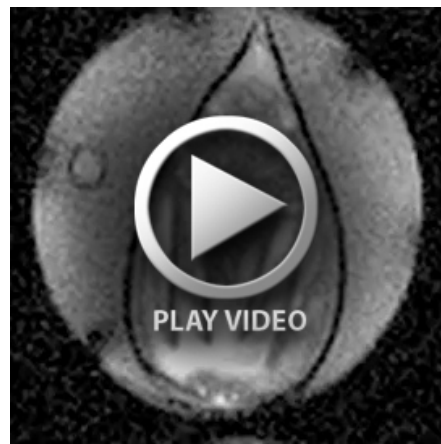

**Movie S2. Continuous water flow in the mantle cavity of *M. galloprovincialis*.** Transverse  $T_{1w}$ -MR images were obtained every 1.92 s for 64 images (122.9 s). Slice position is 1 mm posterior from the AV valve.

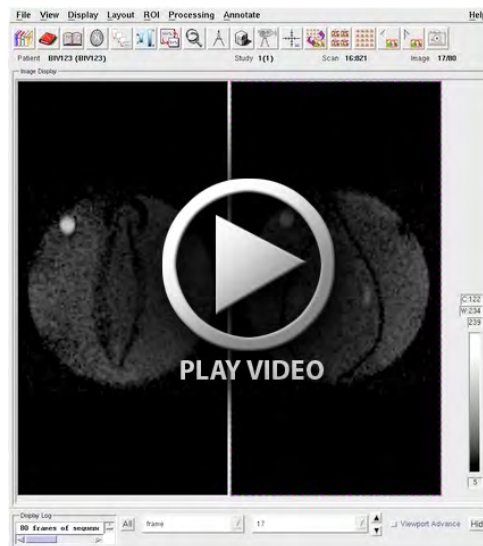

**Movie S3. Opening process of the water flow in the mantle cavity of *M. galloprovincialis*.** Transverse  $T_{1w}$ -MR images were obtained every 1.92 s for 48 images from -18.2 s to 72.0 s. Slice positions are 1 mm and 12 mm posterior from the AV valve. Changes in area of the water flow in the inhalant and exhalant siphons and the interlaminal cavities are shown in Fig. 7B.

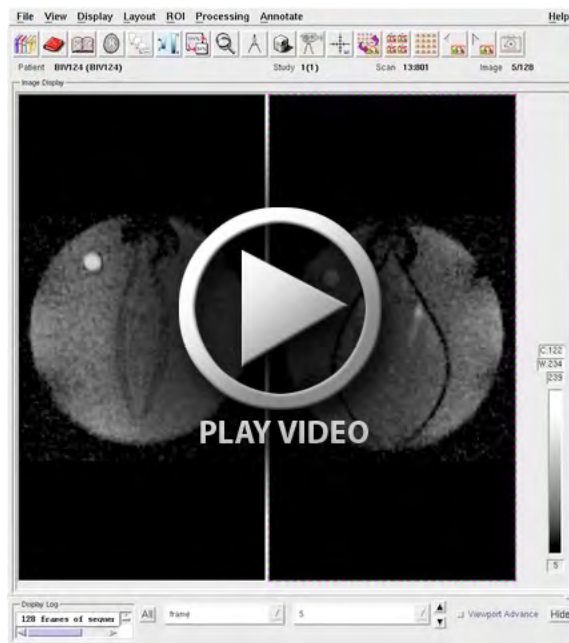

**Movie S4. Rapid changes in the water flow in the mantle cavity during a slow closing process of *M. galloprovincialis*.** Transverse  $T_{1w}$ -MR images were obtained every 1.92 s for 102 images from -4.8 s to 181.4 s. Slice positions are 1 mm and 12 mm posterior from the AV valve. Changes in area of the water flow during the first open/close process in the inhalant and exhalant siphons and the interlaminal cavities are shown in Fig. 8B.

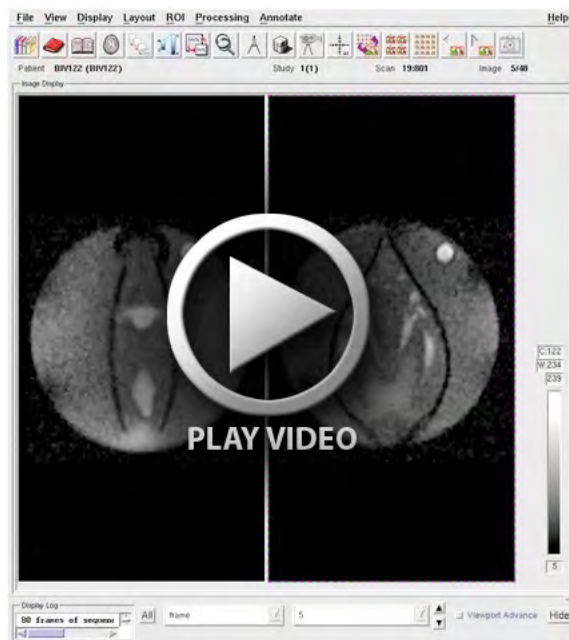

**Movie S5. A short closure process of the water flow in the mantle cavity of *M. galloprovincialis*.** Transverse  $T_{1w}$ -MR images were obtained every 1.92 s for 32 images from -39.4 s to 20.2 s. Slice positions are 1 mm and 12 mm posterior from the AV valve. Changes in area of the water flow in the inhalant and exhalant siphons and the interlaminal cavities are shown in Fig. 9B.
